# Supplementary material for: A unique tetranuclear Ag(i) complex emitting efficient thermally activated delayed fluorescence with a remarkably short decay time
Source: Royal Society of Chemistry journal article supplement (doi:10.1039/c8dt00837j), 2018-01-01
Supplement: c8dt00837j1.pdf [file c8dt00837j1.pdf]

Electronic Supplementary Information

**Unique tetranuclear Ag(I) complex emitting efficient thermally activated delayed fluorescence with a remarkably short decay time**

Xue-Min Gan,<sup>ab</sup> Rongmin Yu,<sup>\*a</sup> Xu-Lin Chen,<sup>a</sup> MingXue Yang,<sup>ab</sup> Ling Lin,<sup>ab</sup> Xiao-Yuan Wu,<sup>a</sup> and Can-Zhong Lu<sup>\*a</sup>

*a* Key Laboratory of Design and Assembly of Functional Nanostructures, Fujian Provincial Key Laboratory of Nanomaterials, Fujian Institute of Research on the Structure of Matter, Chinese Academy of Sciences.

\*E-mail: czlu@fjirsm.ac.cn

*b* Graduate University of Chinese Academy of Sciences, Beijing 100049, China

**Contents**

1. General procedures.

2. Synthesis and characterization.

**Fig. S1** Synthesis of the ligand: DMPTPH.

**Fig. S2** Synthesis of the complex: Ag<sub>4</sub>N<sub>2</sub>P<sub>3</sub>.

**Fig. S3** Powder X-ray diffraction (PXRD) patterns for Ag<sub>4</sub>N<sub>2</sub>P<sub>3</sub>.

**Fig. S4** TGA-plots for Ag<sub>4</sub>N<sub>2</sub>P<sub>3</sub>.

3. Crystal Structure Determination.

**Table S1.** Crystallographic data for complex Ag<sub>4</sub>N<sub>2</sub>P<sub>3</sub>.

**Table S2.** Selected bond distances (Å) and angles (°) of complex Ag<sub>4</sub>N<sub>2</sub>P<sub>3</sub>.

**Fig. S5** ORTEP diagram of Ag<sub>4</sub>N<sub>2</sub>P<sub>3</sub>

**Fig. S6** The structure presentation of Ag<sub>4</sub>N<sub>2</sub>P<sub>3</sub>

**Fig. S7** Schematic representation of the geometrical parameters  $\theta$  in Ag<sub>4</sub>N<sub>2</sub>P<sub>3</sub> viewed from different sides.

4. Computational studies

**Table S3.** The partition orbital composition analyses for the frontier molecular orbitals of complex Ag<sub>4</sub>N<sub>2</sub>P<sub>3</sub>.

**Fig. S8** The frontier orbitals from HOMO-5 to LUMO+2 of complex Ag<sub>4</sub>N<sub>2</sub>P<sub>3</sub> (based on the X-ray structure).

**Table S4.** Orbital transition analyses for lower-lying transition of complex Ag<sub>4</sub>N<sub>2</sub>P<sub>3</sub>.

**Table S5.** The partition composition analyses for the lower-lying excited states of complex Ag<sub>4</sub>N<sub>2</sub>P<sub>3</sub>.

## 1. General procedures.

All reagents are available from commercial sources and were used as received without purification or drying.  $^1\text{H}$  spectra were recorded on a Bruker Avance III 400 MHz NMR spectrometer. Elemental analyses (C, H, N) were carried out using an Elemental Vario EL III elemental analyzer. Powder X-ray diffraction (PXRD) were collected on Rigaku desktop MiniFlex 600 diffractometer with Cu  $K\alpha$  radiation ( $\lambda=1.5418 \text{ \AA}$ ). IR spectra were recorded in the range 4000–400 $\text{cm}^{-1}$  on a Perkin-Elmer FTIR spectrum 2000 spectrometer with pressed KBr pellets. Thermal analyses were performed on a TGA/DSC 1 STARe system from room temperature to 800 $^\circ\text{C}$  with a heating rate of 10 K/min under nitrogen. The UV-vis absorption spectra were recorded using a Perkin-Elmer Lambda-365 UV/vis spectrophotometer. Photoluminescence spectra for solid samples at both 298 K and 77 K were recorded on a HORIBA Jobin-Yvon FluoroMax-4 SPECTROMETER. The lifetimes at different temperatures were determined using a HORIBA Jobin-Yvon FluoroMax-4 instrument with multi-channel scaling (MCS). Emission decay data were analyzed by using the software DAS6 (time-correlated single-photon counting Decay Analysis Software) peripheral equipment. The PL quantum yields measurements of the solids and films equipped with HORIBA Jobin-Yvon FluoroMax-4-equipped with an integrating sphere.

## 2. Experimental Section.

**Fig. S1** Synthesis of the ligand: 2-bromo-6-(3-phenyl-1H-pyrazol-1-yl)pyridine (DMPTPH).

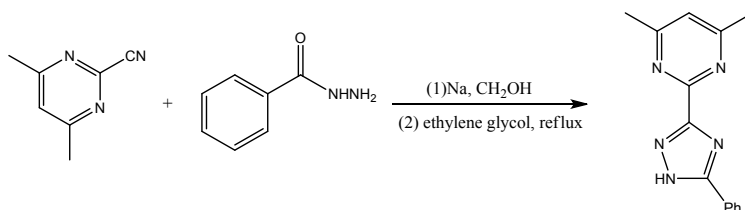

To a stirred suspension of 4,6-dimethylpyrimidine-2-carbonitrile (0.666 g, 5 mmol) in distilled methanol (8 mL) was added sodium (0.230 g, 10 mmol) under nitrogen. After ten minutes, benzohydrazide (0.681 g, 5 mmol) was added and stirred for 30 min at room temperature. The reaction mixture was refluxed overnight to form a large amount of yellow precipitate. After cooling the mixture was filtered and washed with methanol. After being dried for one day, the solid was mixed with 3 ml ethyleneglycol and heated at 200 $^\circ\text{C}$  for 2 h. After cooling to room temperature, the reaction mixture subsequently quenched with 30 ml of water. The aqueous layer was extracted with 3  $\times$  30 mL dichloromethane. Afterward the organic layers were combined, washed with 50 mL brine, and dried over anhydrous  $\text{Na}_2\text{SO}_4$ . The crude product was purified by column chromatography on silica gel and dried under vacuum to afford a white solid (1.043 g, 83%).  $^1\text{H}$  NMR (400 MHz, DMSO- $d_6$ ):  $\delta$  14.90 (s, 1H), 8.11 (d,  $J$  = 7.6 Hz, 2H), 7.60 – 7.42 (m, 3H), 7.39 (s, 1H), 2.55 (s, 6H).

**Fig. S2** Synthesis of the complex:  $[\text{Ag}_4(\mu\text{-DMPTP})_2(\text{POP})_3][\text{BF}_4]_2$  ( $\text{Ag}_4\text{N}_2\text{P}_3$ ).

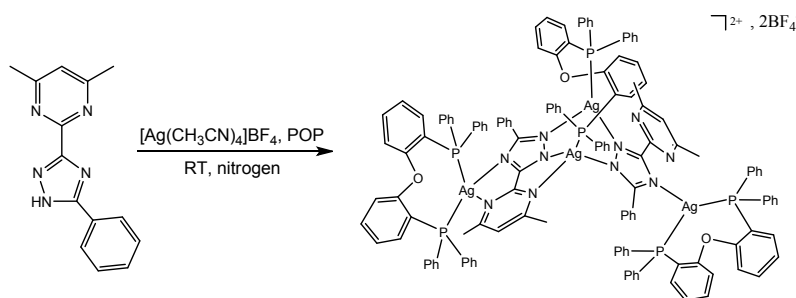

A mixture of 2-bromo-6-(3-phenyl-1H-pyrazol-1-yl)pyridine (DMPTPH) (0.050 g, 0.2 mmol),  $[\text{Ag}(\text{CH}_3\text{CN})_4]\text{BF}_4$  (0.143 g, 0.4 mmol) in dry dichloromethane (10 mL) under a nitrogen atmosphere was stirred for 0.5 h and then bis[2-(diphenylphosphine)phenyl]ether (POP) (0.016 g, 0.3 mmol) was added. After stirring for another 3 h, the solvent was evaporated. Yield: 137 mg, 52%. Single crystals of these products suitable for X-ray diffraction measurements were obtained by low evaporation of its mixed solvent of dichloromethane and ethanol ( $v:v = 2:1$ ).

$[\text{Ag}_4(\mu\text{-DMPTP})_2(\text{POP})_3][\text{BF}_4]_2$ . FTIR (KBr pellet,  $\text{cm}^{-1}$ ): 3056m, 1635w, 1593s, 1562w, 1540s, 1462s, 1435s, 1386w, 1350w, 1260s, 1218s, 1160w, 1055s, 871w, 801w, 748s, 694s, 510s, 473s. Anal. calcd for  $\text{C}_{142}\text{H}_{126}\text{Ag}_4\text{N}_{10}\text{P}_6\text{B}_2\text{F}_8\text{O}_6$ : C, 59.63; H, 4.41; N, 4.89. Found: C, 59.89; H, 4.09; N, 4.75.

**Fig. S3** Powder X-ray diffraction (PXRD) patterns for  $\text{Ag}_4\text{N}_2\text{P}_3$ .

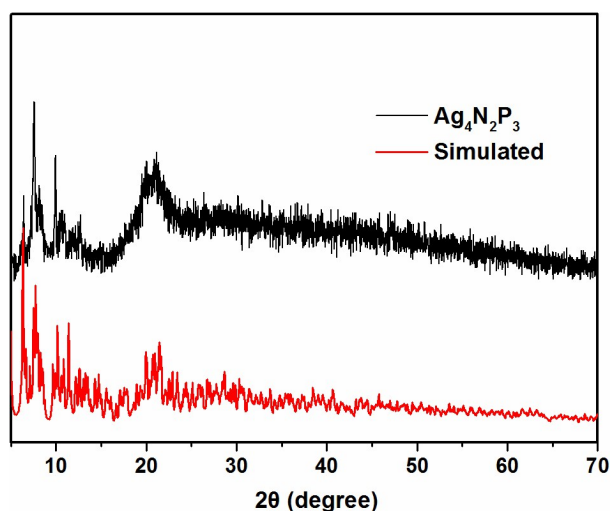

**Fig. S4** TGA and DSC plots for  $\text{Ag}_4\text{N}_2\text{P}_3$ .

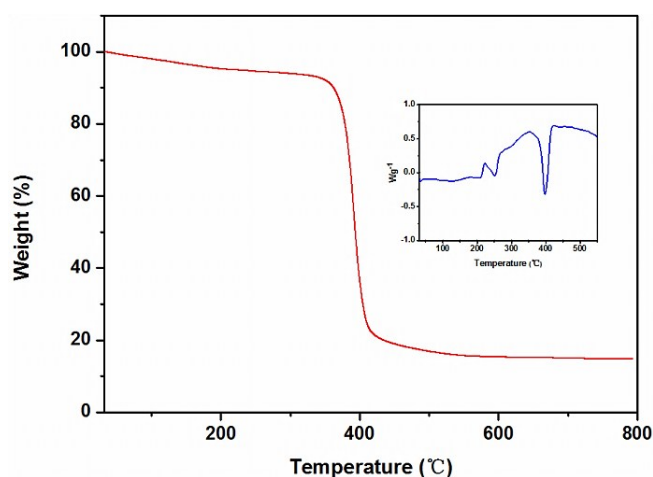

### 3. Crystal Structure Determination.

Crystallographic data for the complexes were mounted on loop for the X-ray measurement. Diffraction data

collected on a SuperNova, Dual source, Cu at zero, Atlas diffractometer equipped with graphic monochromated Cu K $\alpha$  radiation ( $\lambda=1.54184$  Å) at 100K under a cold nitrogen stream. Structures were solved using direct methods and refined using full-matrix least squares against  $F^2$  with the SHELXL-97 program package. Hydrogen atoms of the organic ligands were added geometrically and the non-hydrogen atoms except for the isordered moieties were refined anisotropically. The crystallographic data has been deposited at the Cambridge Crystallographic Data Center with reference number CCDC 1822327 for complex  $\text{Ag}_4\text{N}_2\text{P}_3$ . This data can be obtained free of charge from The Cambridge Crystallographic Data Centre via [http://www.ccdc.cam.ac.uk/data\\_request/cif](http://www.ccdc.cam.ac.uk/data_request/cif).

**Table S1.** Crystallographic data for complex  $\text{Ag}_4\text{N}_2\text{P}_3$ .

| Compound                                                 | $[\text{Ag}_4(\mu\text{-DMPTP})_2(\text{POP})_3][\text{BF}_4]_2 \cdot 3\text{C}_2\text{H}_5\text{OH}$ |
|----------------------------------------------------------|-------------------------------------------------------------------------------------------------------|
| Empirical formula                                        | C142H126Ag4N10O6P6B2F8                                                                                |
| formula weight                                           | 2859.44                                                                                               |
| crystal system                                           | Triclinic                                                                                             |
| space group                                              | P-1                                                                                                   |
| a/Å                                                      | 14.0433 (4)                                                                                           |
| b/Å                                                      | 21.6547 (7)                                                                                           |
| c/Å                                                      | 22.9726 (6)                                                                                           |
| $\alpha$ /°                                              | 73.403 (2)°                                                                                           |
| $\beta$ /°                                               | 83.415 (2)°                                                                                           |
| $\gamma$ /°                                              | 89.935 (2)°                                                                                           |
| Volume/Å <sup>3</sup>                                    | 6647.2 (3)                                                                                            |
| Crystal size [mm <sup>3</sup> ]                          | 0.15 × 0.14 × 0.14                                                                                    |
| Z                                                        | 2                                                                                                     |
| $\rho_{\text{calc}}/\text{g}\cdot\text{cm}^{-3}$         | 1.438                                                                                                 |
| Index ranges h, k, l                                     | □13/17, □26/26, □27/25                                                                                |
| $\mu/\text{mm}^{-1}$                                     | 5.914                                                                                                 |
| F(000)                                                   | 2912                                                                                                  |
| $\lambda/\text{Å}$                                       | 1.54184                                                                                               |
| Temperature/K                                            | 100                                                                                                   |
| Reflections collected/unique                             | 46034/25147                                                                                           |
| $R_{\text{int}}$                                         | 0.0588                                                                                                |
| $\theta$ range for data collection/°                     | 3.551-70.075                                                                                          |
| GOF on $F^2$                                             | 1.035                                                                                                 |
| $R_1/\text{WR}_2^{\text{a}}(\text{I}>2\sigma(\text{I}))$ | 0.0710/0.1900                                                                                         |
| $R_1/\text{WR}_2^{\text{b}}(\text{all data})$            | 0.0910/0.2096                                                                                         |
| CCDC number                                              | 1822327                                                                                               |

$$^{\text{a}} R_1 = \sum \|F_o\| - |F_c| / \sum \|F_o\|; ^{\text{b}} \text{w}R_2 = [\sum w(F_o^2 - F_c^2)^2 / \sum w(F_o^2)]^{1/2}$$

**Table S2.** Selected bond distances (Å) and angles (°) of complex  $\text{Ag}_4\text{N}_2\text{P}_3$ .

| Compound | $\text{Ag}_4\text{N}_2\text{P}_3$ |
|----------|-----------------------------------|
|----------|-----------------------------------|

|              |             |             |
|--------------|-------------|-------------|
| Distances(Å) | Ag1—N1      | 2.215 (5)   |
|              | Ag1—P1      | 2.3984 (14) |
|              | Ag1—P2      | 2.5450 (14) |
|              | Ag2—N6      | 2.279 (5)   |
|              | Ag2—N2      | 2.298 (5)   |
|              | Ag2—P3      | 2.3639 (14) |
|              | Ag2—N9      | 2.625 (5)   |
|              | Ag3—N3      | 2.266 (5)   |
|              | Ag3—N7      | 2.284 (5)   |
|              | Ag3—P4      | 2.3502 (13) |
|              | Ag4—N8      | 2.286 (4)   |
|              | Ag4—P5      | 2.3902 (15) |
|              | Ag4—N10     | 2.3902 (15) |
|              | Ag4—P6      | 2.5492 (15) |
| Angles(°)    | N1—Ag1—P1   | 143.63 (12) |
|              | N1—Ag1—P2   | 99.72 (12)  |
|              | P1—Ag1—P2   | 113.00 (5)  |
|              | N6—Ag2—N2   | 87.97 (17)  |
|              | N6—Ag2—P3   | 143.61 (11) |
|              | N2—Ag2—P3   | 143.42 (13) |
|              | N6—Ag2—N9   | 68.71 (16)  |
|              | N2—Ag2—N9   | 111.44 (16) |
|              | P3—Ag2—N9   | 113.06 (11) |
|              | N3—Ag3—N7   | 89.79 (17)  |
|              | N3—Ag3—P4   | 65.51 (16)  |
|              | N7—Ag3—P4   | 124.87 (12) |
|              | N8—Ag4—P5   | 131.76 (13) |
|              | N8—Ag4—N10  | 73.95 (17)  |
|              | P5—Ag4—N10  | 124.04 (12) |
|              | N8—Ag4—P6   | 97.72 (12)  |
| P5—Ag4—P6    | 97.72 (12)  |             |
| N10—Ag4—P6   | 104.91 (13) |             |

**Fig. S5** ORTEP diagram of  $\text{Ag}_4\text{N}_2\text{P}_3$  (the anions, hydrogen atoms and included solvent molecules have been omitted for clarity)

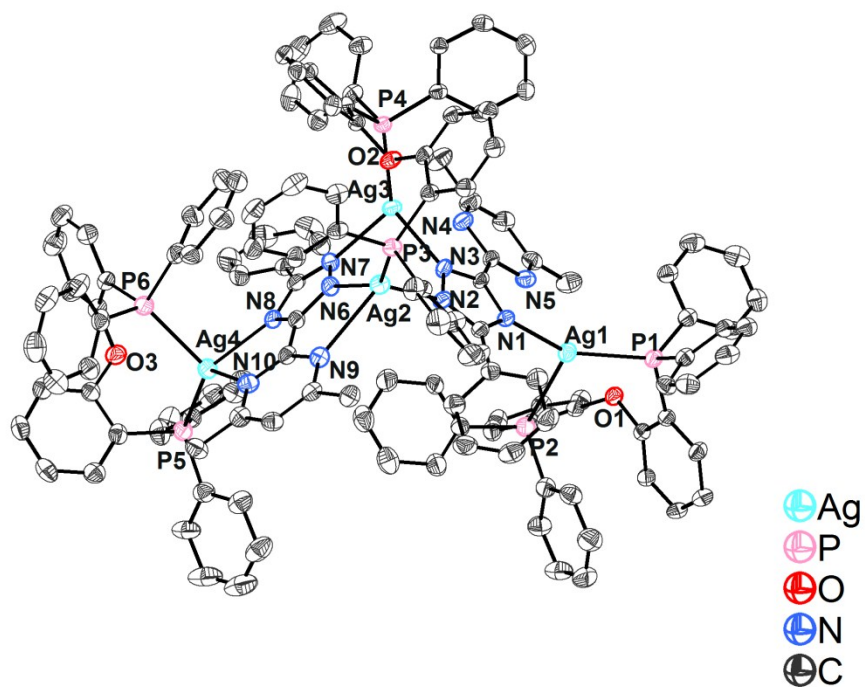

**Fig. S6** The structure presentation of  $\text{Ag}_4\text{N}_2\text{P}_3$  (Solvent molecules, the anions, H atoms and some phenyl C atoms of the POP ligands are omitted).

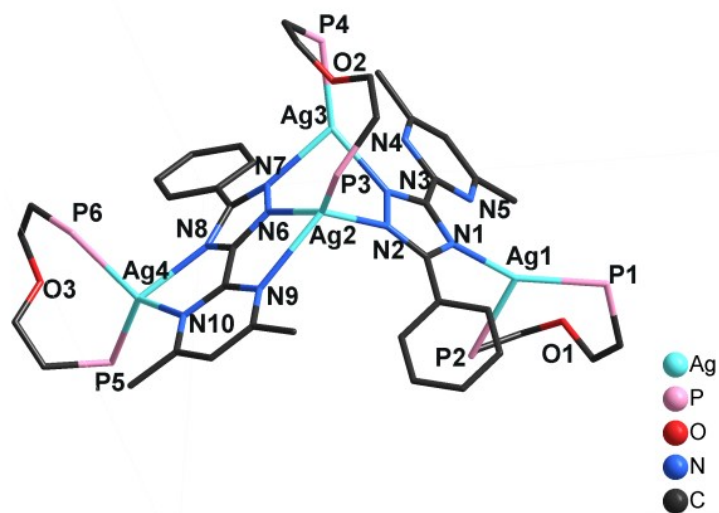

**Fig. S7** Schematic representation of the geometrical parameters  $\theta$  in  $\text{Ag}_4\text{N}_2\text{P}_3$  viewed from different sides (Solvent molecules, the anions and H atoms are omitted).

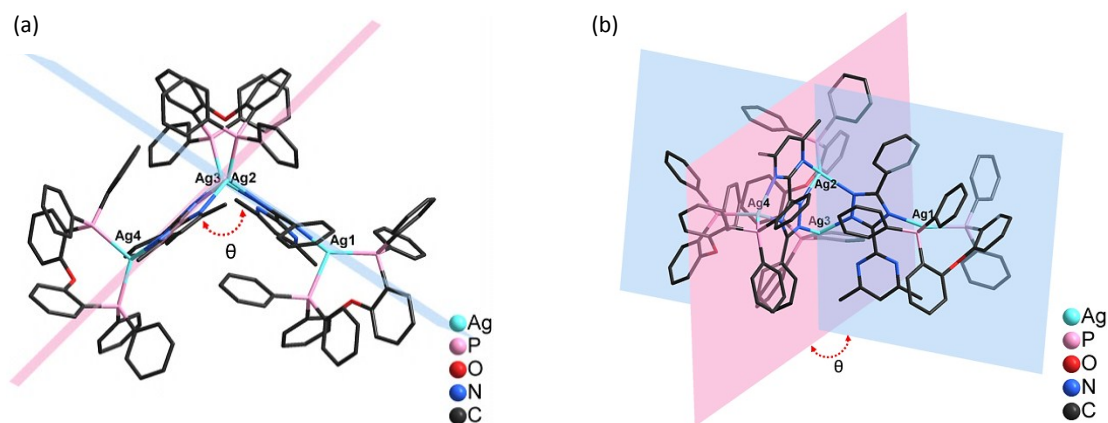

## 5. Computational studies.

Calculations on the electronic structures of complex  $\text{Ag}_4\text{N}_2\text{P}_3$  were carried out by density functional theory (DFT) with Becke's three-parameter B3LYP hybrid functional level. The input data were obtained from the X-ray crystal structure. A "double- $\zeta$ " quality basis set consisting of Hay and Wadt's effective core potentials (LANL2DZ) was employed for the Cu atom in which an effective core potential (ECP) replaces the inner core electrons, and the basis set of 6-31G\* was used for P, N, C, O and H atoms. Time-dependent DFT (TD-DFT) calculations were performed to determine emission energies at their singlet and triplet excited states using the same functional, basis sets, and crystal model. Natural transition orbitals (NTOs) were computed by applying the unitary transformation that diagonalizes the transition density matrix obtained from TDDFT calculations and represents the electron excitation as a single-particle electron-hole pair. All calculations were carried out using Gaussian 09. The partition orbital composition and electron excitation analysis were calculated by using the Multiwfn 3.4 program.

**Table S3.** The partition orbital composition analyses for the frontier molecular orbitals of complex  $\text{Ag}_4\text{N}_2\text{P}_3$  (based on the X-ray structure).

|         | Energy (au.) | DMPTP  | Ag     | POP    |
|---------|--------------|--------|--------|--------|
| HOMO-12 | -0.355       | 47.70% | 25.93% | 26.36% |
| HOMO-11 | -0.353       | 47.42% | 29.35% | 23.22% |
| HOMO-10 | -0.349       | 16.42% | 15.53% | 68.04% |
| HOMO-9  | -0.346       | 5.36%  | 14.91% | 79.73% |
| HOMO-8  | -0.341       | 4.70%  | 13.66% | 81.64% |
| HOMO-7  | -0.340       | 5.49%  | 14.59% | 79.92% |
| HOMO-6  | -0.340       | 1.98%  | 5.51%  | 92.51% |
| HOMO-5  | -0.338       | 26.31% | 25.50% | 48.19% |
| HOMO-4  | -0.336       | 56.06% | 3.65%  | 40.29% |
| HOMO-3  | -0.332       | 82.13% | 8.23%  | 9.64%  |
| HOMO-2  | -0.327       | 28.14% | 19.52% | 52.34% |
| HOMO-1  | -0.324       | 8.92%  | 17.64% | 73.44% |
| HOMO    | -0.319       | 3.50%  | 18.03% | 78.46% |
| LUMO    | -0.167       | 94.20% | 2.13%  | 3.68%  |
| LUMO+1  | -0.165       | 94.76% | 1.97%  | 3.28%  |

|        |        |        |       |        |
|--------|--------|--------|-------|--------|
| LUMO+2 | -0.163 | 94.00% | 1.83% | 4.17%  |
| LUMO+3 | -0.161 | 93.59% | 1.70% | 4.71%  |
| LUMO+4 | -0.145 | 1.15%  | 2.39% | 96.46% |
| LUMO+5 | -0.144 | 3.06%  | 2.06% | 94.88% |

**Fig. S8** The frontier orbitals from HOMO-5 to LUMO+2 of complex  $\text{Ag}_4\text{N}_2\text{P}_3$  (based on the X-ray structure).

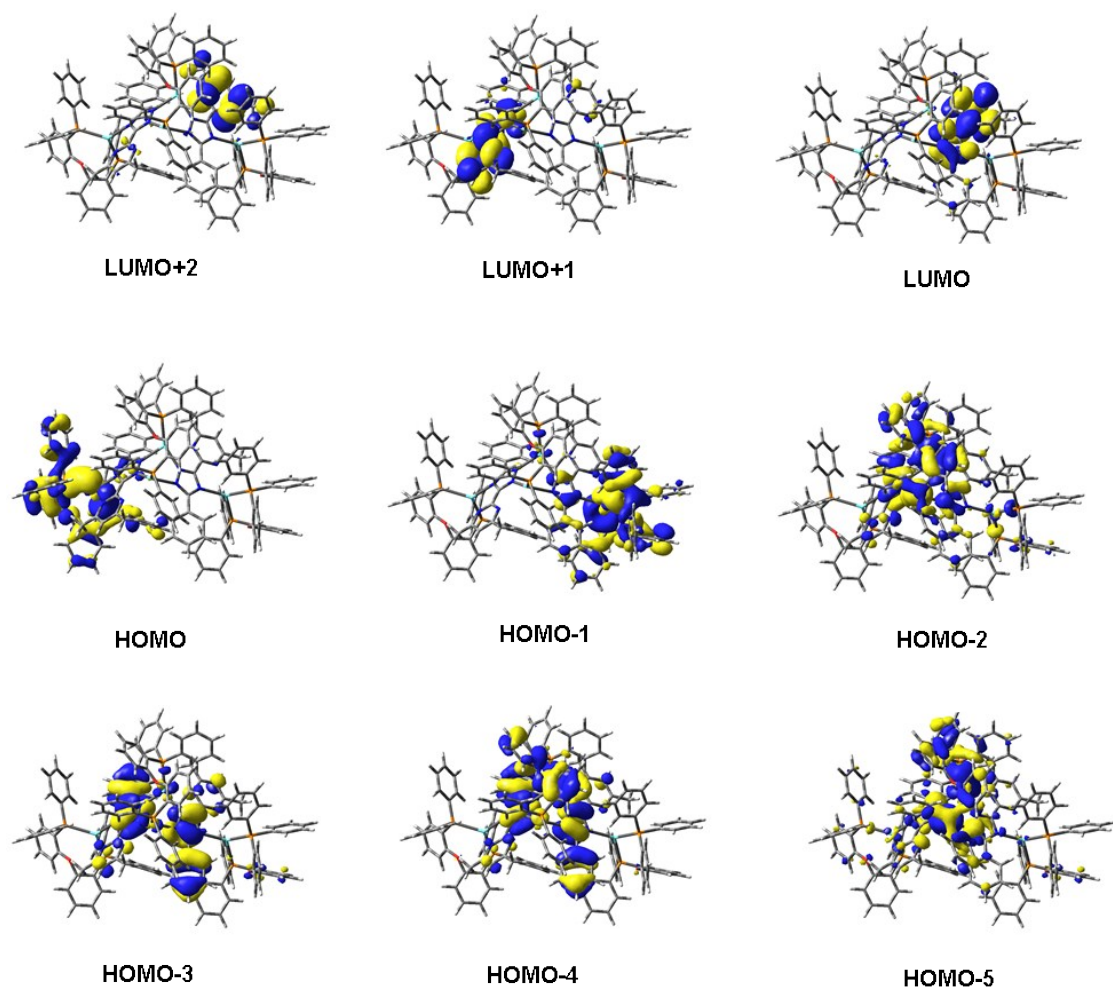

**Table S4.** Orbital transition analyses for lower-lying transition of complex  $\text{Ag}_4\text{N}_2\text{P}_3$  (based on the X-ray structure).



|                 | $\lambda_{cal}(nm)$ | f      | Main contribution       | Electron                                                                            | Hole                                                                                 | MLCT   |
|-----------------|---------------------|--------|-------------------------|-------------------------------------------------------------------------------------|--------------------------------------------------------------------------------------|--------|
| S <sub>1</sub>  | 369.60              | 0.0232 | HOMO-1->LUMO<br>(95%)   | 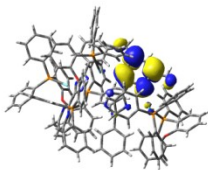   |    | 19.50% |
| S <sub>2</sub>  | 363.47              | 0.0149 | HOMO->LUMO+2<br>(85%)   |    |    |        |
| S <sub>3</sub>  | 361.67              | 0.0107 | HOMO->LUMO<br>(61%)     |    |    |        |
| S <sub>5</sub>  | 353.42              | 0.0135 | HOMO-1->LUMO+1<br>(53%) |   |   |        |
| S <sub>7</sub>  | 344.89              | 0.0125 | HOMO->L+3<br>(71%)      |  |  |        |
| S <sub>9</sub>  | 335.06              | 0.0141 | HOMO-2->L+2<br>(64%)    |  |  |        |
| S <sub>10</sub> | 332.65              | 0.0023 | HOMO-3->LUMO<br>(76%)   |  |  |        |
| T <sub>1</sub>  | 405.58              | 0      | HOMO-1->LUMO+1<br>(22%) |  |  | 10.37% |
| T <sub>2</sub>  | 379.32              | 0      | HOMO-1->LUMO<br>(60%)   |  |  |        |

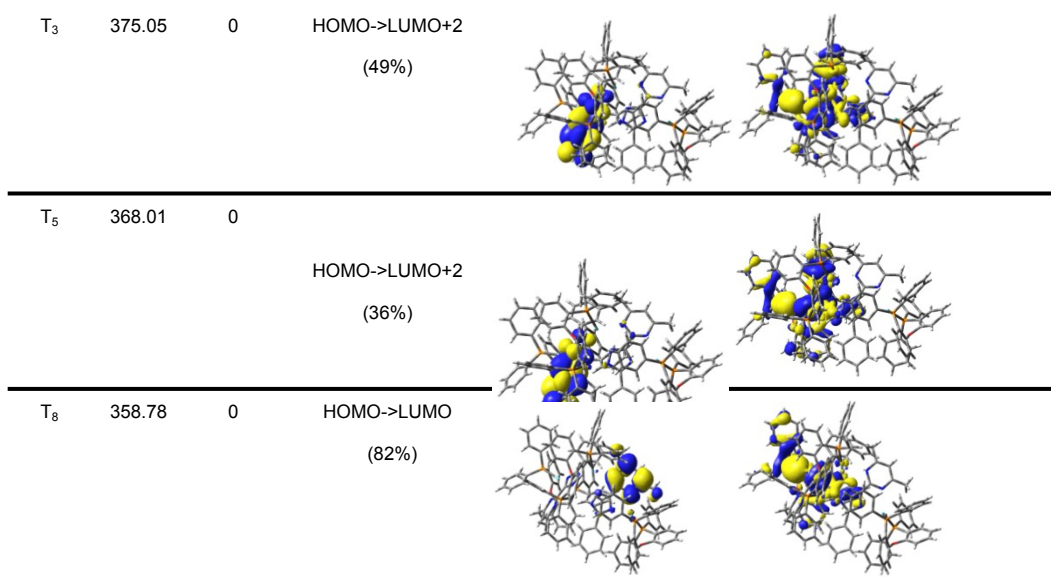

**Table S5.** The partition composition analyses for the lower-lying excited states of complex Ag<sub>4</sub>N<sub>2</sub>P<sub>3</sub> (based on the X-ray structure).

|                |            | Ag     | DMPTP   | POP    |
|----------------|------------|--------|---------|--------|
| S <sub>1</sub> | hole       | 22.06% | 13.65%  | 64.29% |
|                | electron   | 2.57%  | 93.49%  | 3.94%  |
|                | difference | 19.50% | -79.84% | 60.34% |
| S <sub>2</sub> | hole       | 24.86% | 7.41%   | 67.72% |
|                | electron   | 2.89%  | 92.50%  | 4.62%  |
|                | difference | 21.98% | -85.08% | 63.10% |
| T <sub>1</sub> | hole       | 13.24% | 69.79%  | 16.97% |
|                | electron   | 2.87%  | 91.46%  | 5.67%  |
|                | difference | 10.37% | -21.67% | 11.30% |
| T <sub>2</sub> | hole       | 22.37% | 34.16%  | 43.47% |
|                | electron   | 2.65%  | 93.40%  | 3.95%  |
|                | difference | 19.73% | -59.25% | 39.52% |
